# Supplementary material for: Holistic Optimization of Bioinformatic Analysis Pipeline for Detection and Quantification of 2′-O-Methylations in RNA by RiboMethSeq
Source: PubMed Central journal article supplement (PMC7031861; doi:10.3389/fgene.2020.00038), 2020-02-13
Supplement: Presentation_1.pdf [file Presentation_1.pdf]

# Holistic optimization of bioinformatic analysis pipeline for detection and quantification of 2'-O-methylations in RNAs by RiboMethSeq

Florian Pichot<sup>1,2</sup>, Virginie Marchand<sup>1,2</sup>, Lilia Ayadi<sup>1,2</sup>, Valérie Bourguignon-Igel<sup>1,2</sup>, Mark Helm<sup>3</sup>, Yuri Motorin<sup>1,2\*</sup>

## Supplementary Figures and Tables

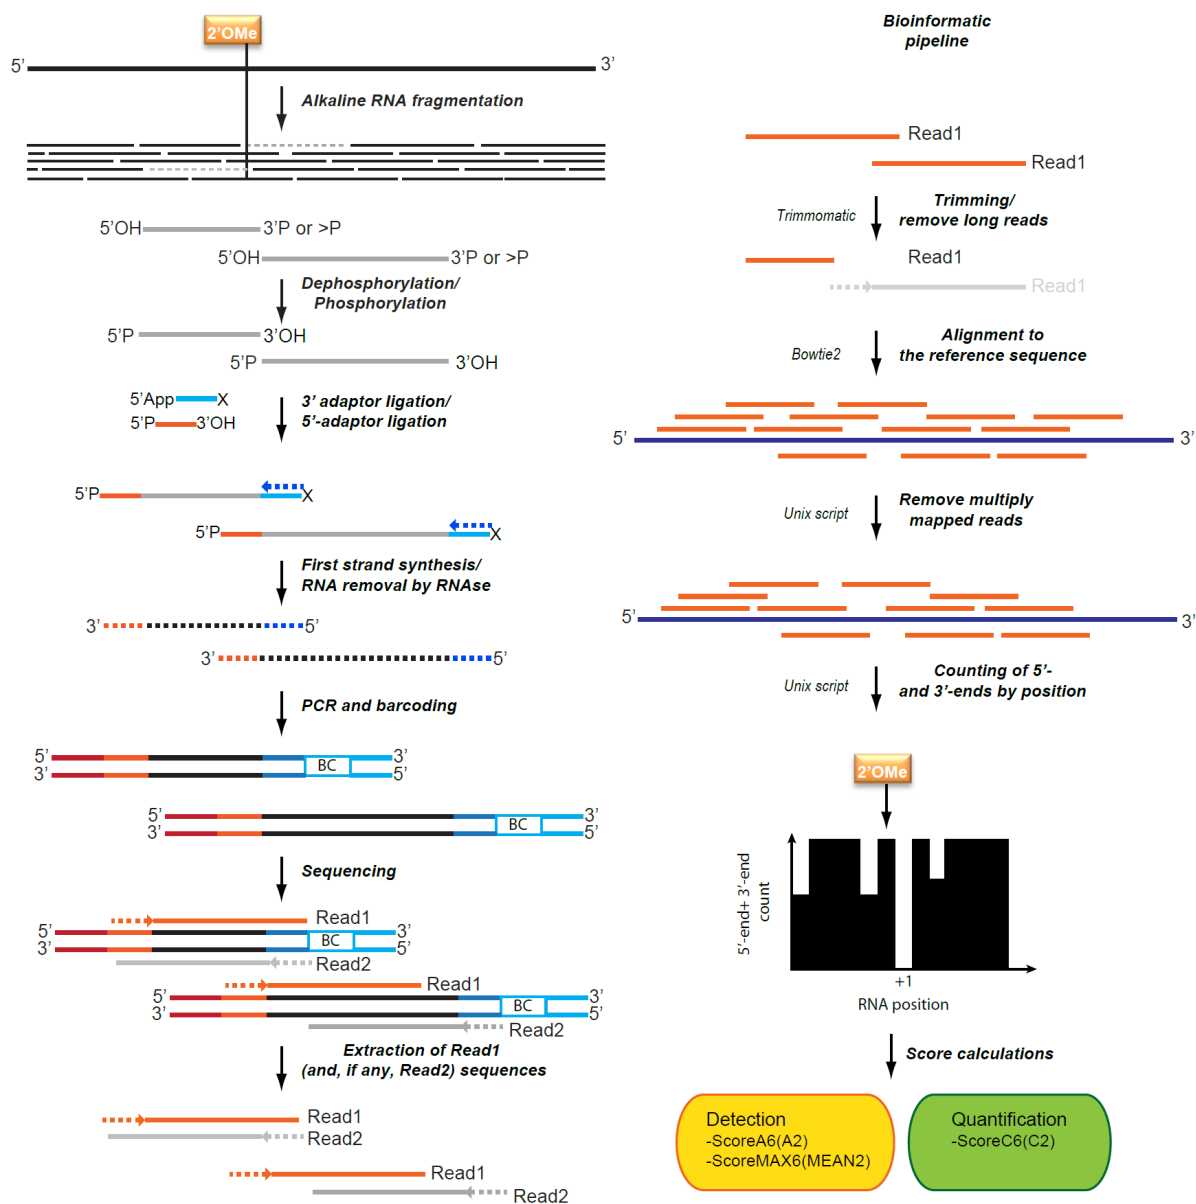

Figure S1 Outline of RiboMethSeq protocol for 2'-O-methylation detection in RNAs, "wet" lab steps and major steps of the data treatment pipeline are shown.

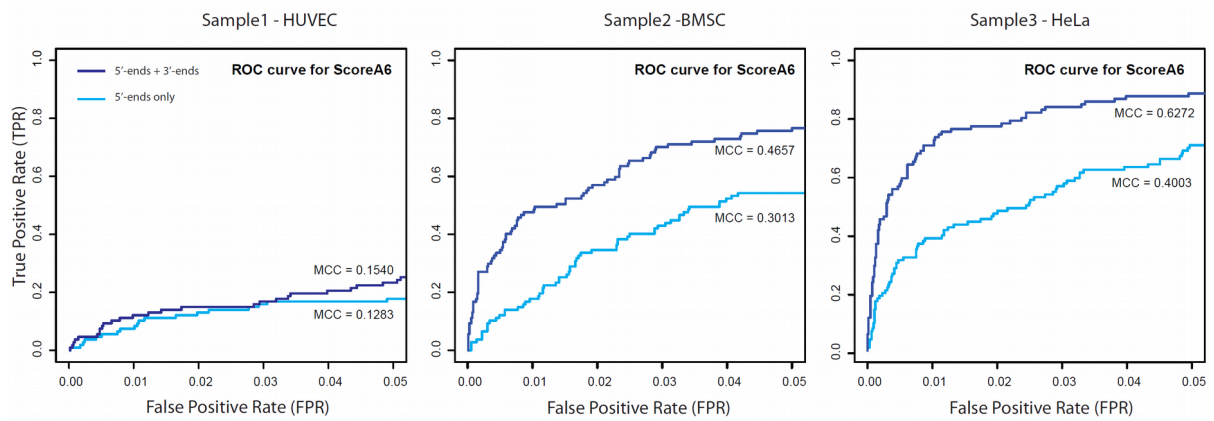

Figure S2 Selection of RiboMethSeq datasets for optimization. Three datasets providing representative performance in 2'-O-Me detection (Sample1 - HUVEC, 2 - BMSC, and 3 -HeLa, from left to right) were selected on the basis of ROC curve and associated max MCC values for ScoreA6. Graphs represent zoom to ROC curve 0-0.05 for FPR, 0-1 for TPR. It was previously shown that 5'-end coverage only (light blue curve) is sufficient for reliable construction of RNA protection/2'-O-Me profile, but cumulated 5'- and 3'-ends coverage (dark blue curve) generally provides better discrimination between methylated positions and FP hits.

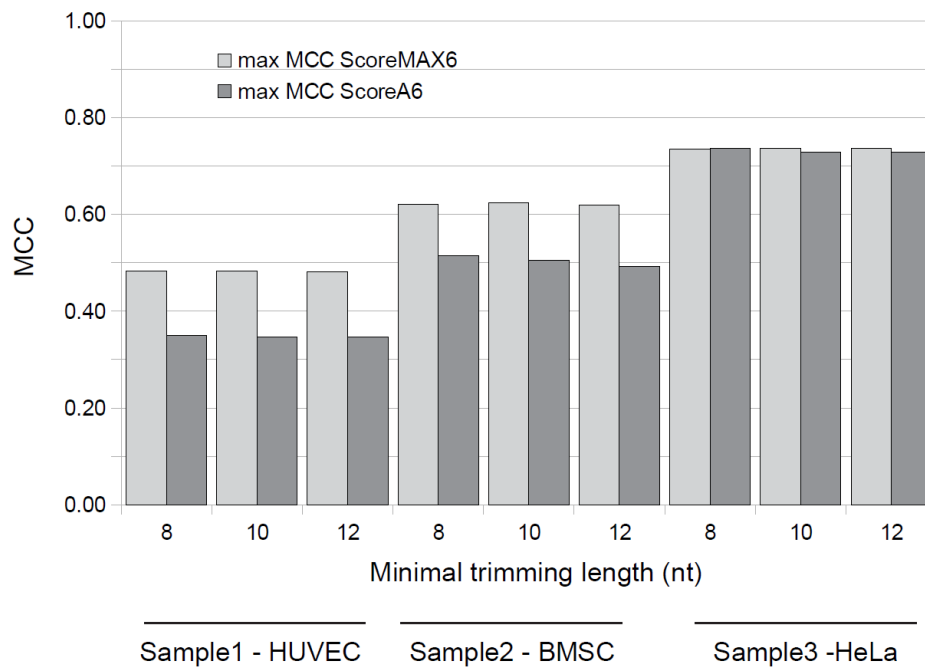

Figure S3 Influence of trimming parameters on max MCC values for ScoreMAX (MAX6) and ScoreA6. Trimming of raw reads was done using three minimal length (8 nt, 10 nt and 12 nt). Barplot shows max MCC values for ScoreMAX6 and ScoreA6, for three samples (Sample1 - HUVEC, 2 -BMSC and 3 - HeLa) retained for evaluation.

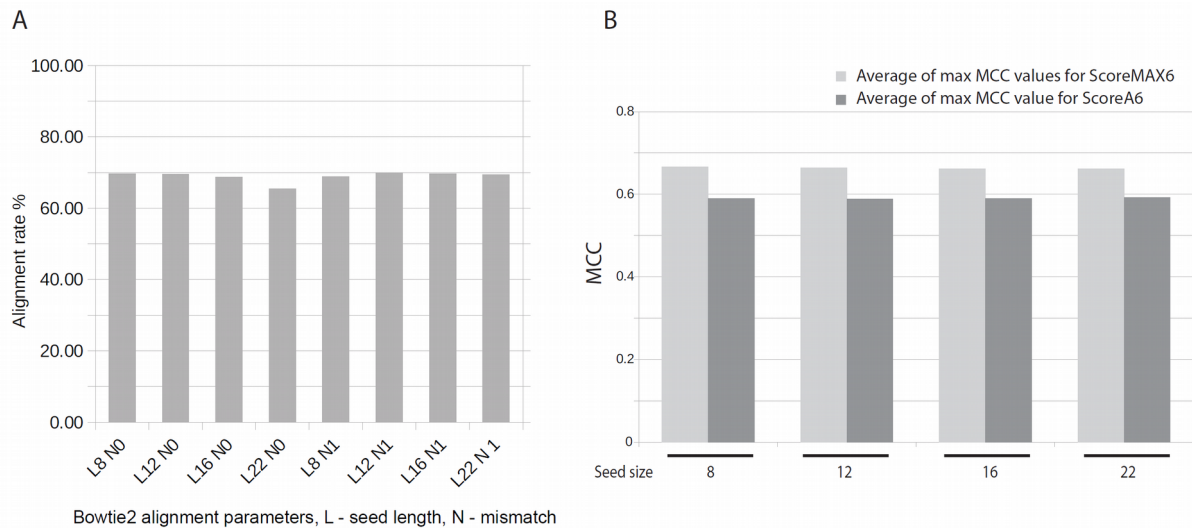

**Figure S4** Influence of the Bowtie2 alignment parameters on the proportion of total aligned reads and on the performance of 2'-O-Me detection. Alignment statistics for Sample2- BMSC with different seed length and mismatch (Panel A). Panel B - ScoreMAX (MAX6) gives better performance compared to ScoreA6 in detection of 2'-O-Me sites, at all seed length tested. Average values of max MCC calculated for Samples1 - HUVEC, 2 - BMSC and 3 - HeLa.

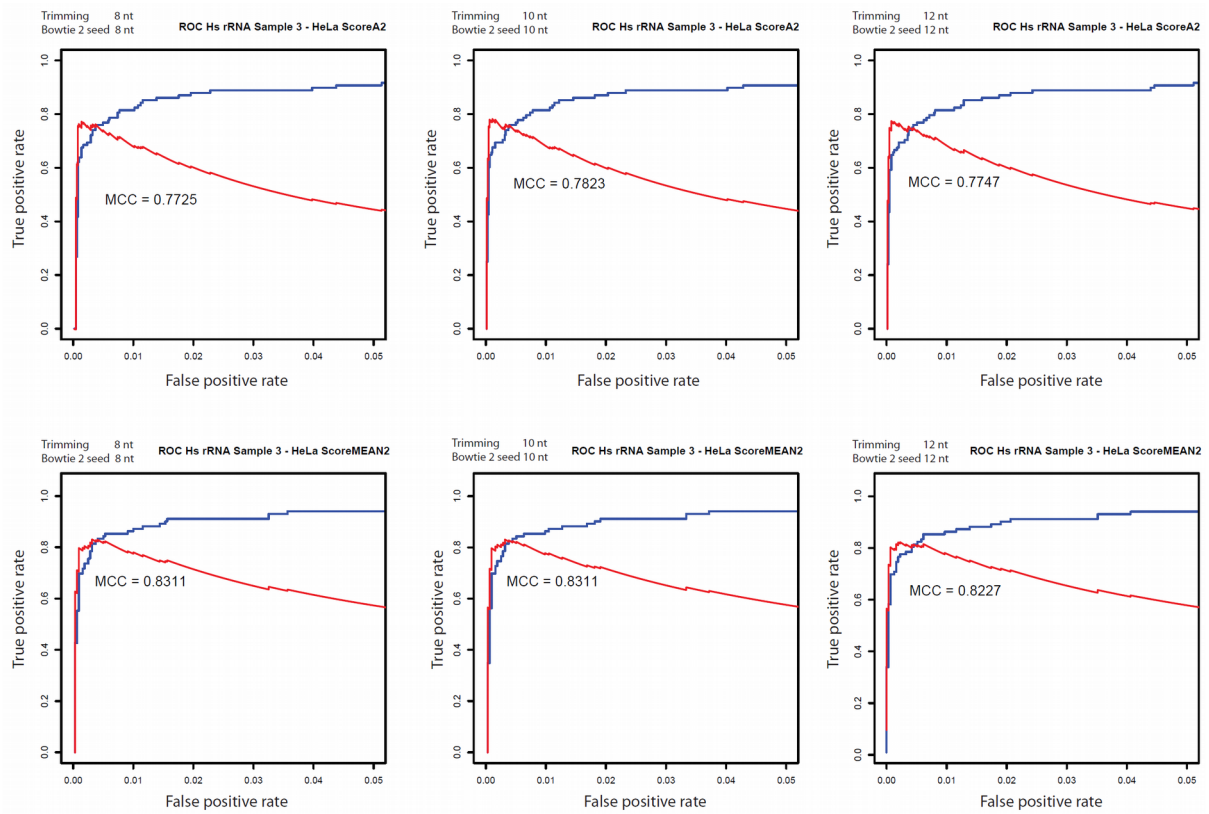

Figure S5 Measured performance for combinations Trimming/Bowtie2 parameters (trimming length/Bowtie2 seed length) for ScoreA2 and ScoreMEAN2. Sample 3 - HeLa was used for calculations of ROC curves. Blue curve – TP hits, red curve- MCC. Max MCC value is given on the graph. The same coordinates as in Figure S1 were used (FPR 0-0.05, TPR 0-1).

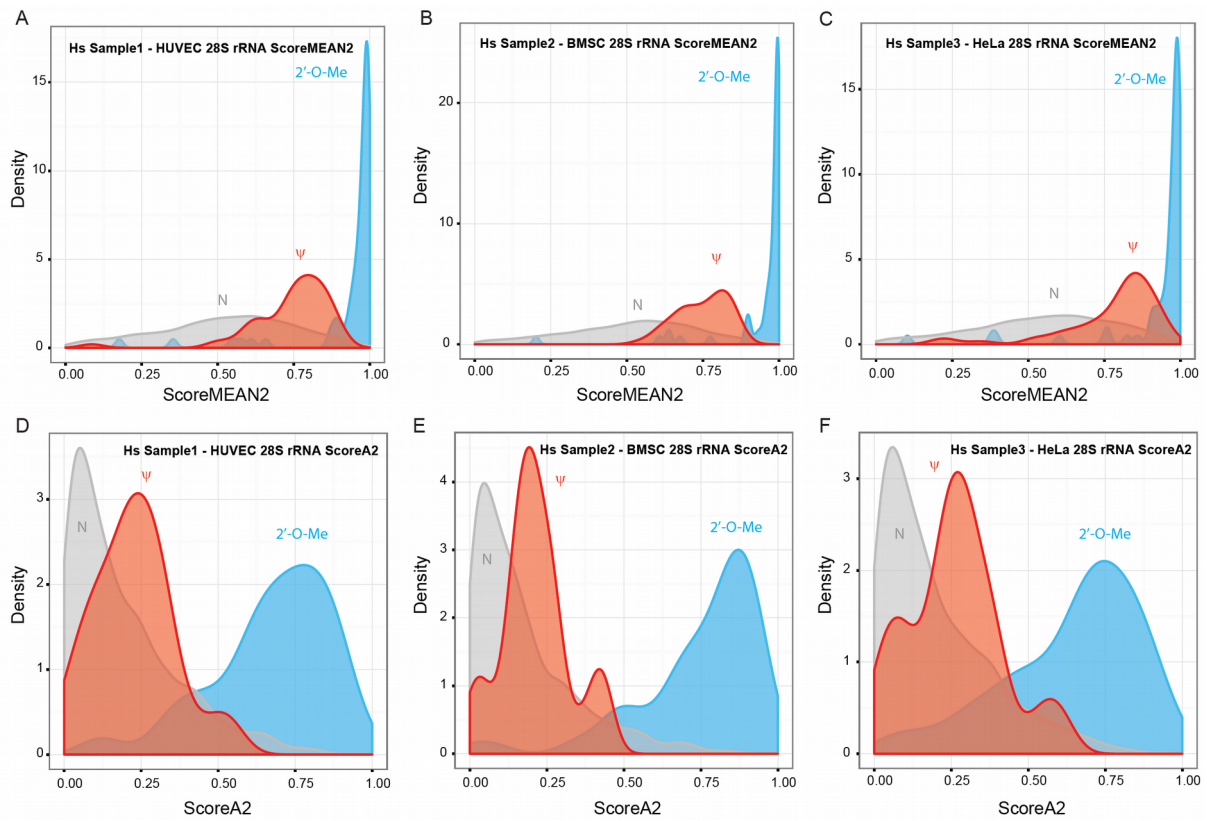

Figure S6 Density plots for signals observed at 2'-O-Me positions (light blue), pseudouridines (red) and unmodified nucleotides (gray) in human 28S rRNA. Graphs were made for Sample1 – HUVEC, 2 – BMSC, and 3 – HeLa. Samples1, 2 and 3 (Panels A/D, B/E and C/F, respectively, and for ScoreMEAN2 and ScoreA2 (top and bottom, respectively).

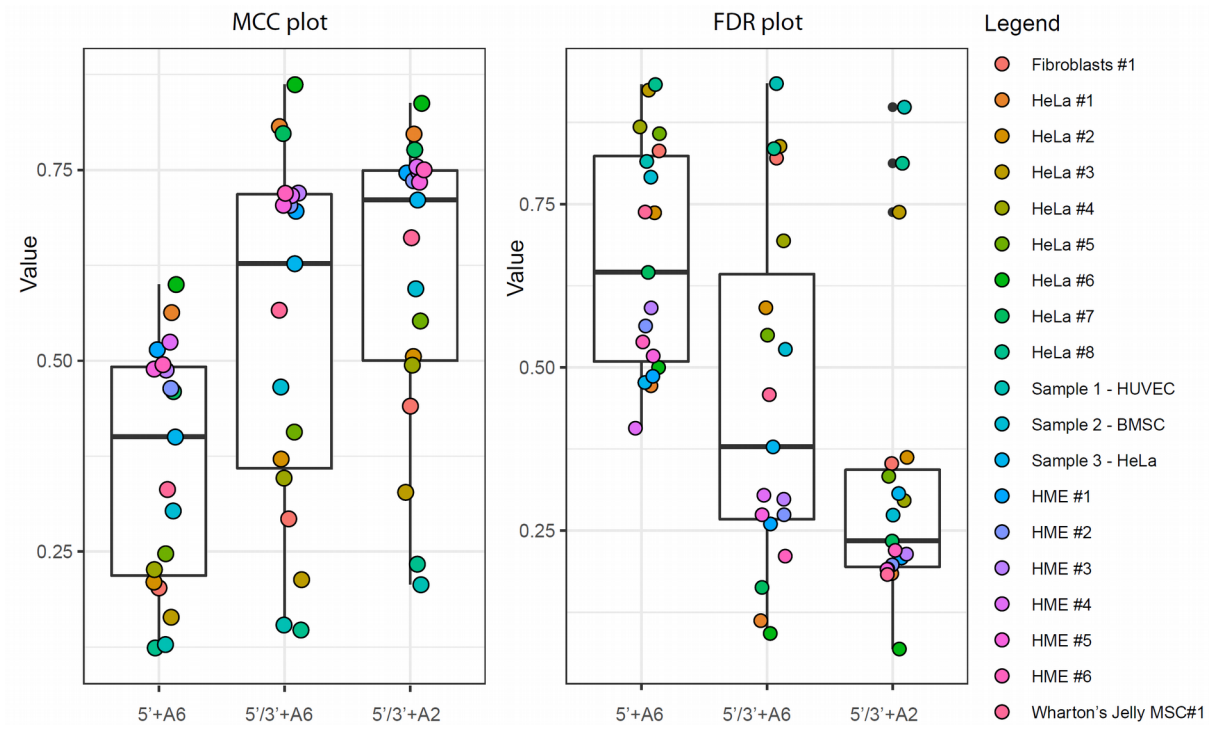

Figure S7 Improvement of ScoreA (A6 and A2) with 5'/3'-counts and reduced calculation window (Score 2 calculation scheme). Boxplot shows max MCC values (left) and associated FDR (right) for all 19 RiboMethSeq datasets used for validation. Identity of the RiboMethSeq datasets is given on the right.

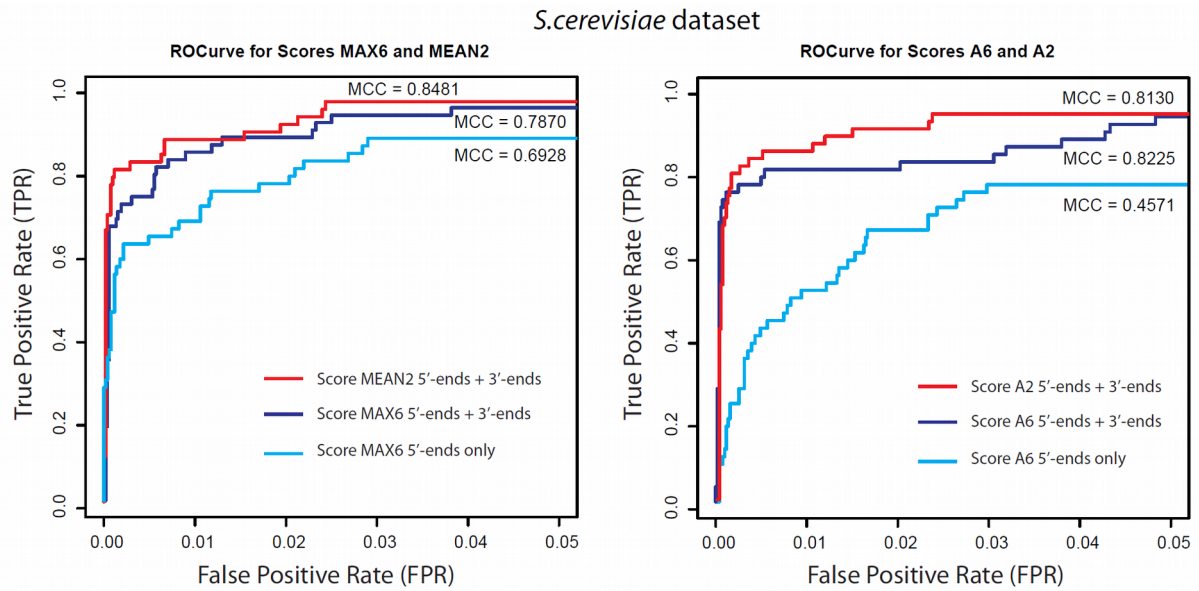

Figure S8 Validation of RiboMethSeq Score 2 calculation scheme using *S.cerevisiae* rRNA dataset. Graphs represent zoom to ROC curve 0-0.05 for FPR, 0-1 for TPR. It was previously shown that 5'-end coverage only (light blue curve) is sufficient for reliable construction of RNA protection/2'-O-Me profile, but cumulated 5'- and 3'-ends coverage (dark blue curve) generally provides better discrimination between methylated positions and FP hits. Improvements related to use of Score 2 calculation scheme are shown by red curve and associated MCC value.



## Supplementary Tables

**Table S1** List of human rRNA modifications considered in this study

(reference for human 28S rRNA sequence NR\_046235 for the position / GeneBank U13369 for the modifications numbering)

| RNA  | position | modification | RNA | position | modification | RNA | position | modification | RNA | position | modification |
|------|----------|--------------|-----|----------|--------------|-----|----------|--------------|-----|----------|--------------|
| 5.8S | 14       | Um14         | 18S | 966      | Psi966       | 28S | 1862     | Psi1849      | 28S | 3944     | Gm3923       |
| 5.8S | 55       | Psi55        | 18S | 1004     | Psi1004      | 28S | 1871     | Am1858       | 28S | 3959     | Psi3938      |
| 5.8S | 69       | Psi69        | 18S | 1031     | Am1031       | 28S | 2292     | Cm2279       | 28S | 4042     | Gm4020       |
| 5.8S | 75       | Gm75         | 18S | 1056     | Psi1056      | 28S | 2351     | Cm2338       | 28S | 4054     | Cm4032       |
|      |          |              | 18S | 1081     | Psi1081      | 28S | 2363     | Am2350       | 28S | 4196     | Gm4166       |
| 18S  | 27       | Am27         | 18S | 1174     | Psi1174      | 28S | 2364     | Gm2351       | 28S | 4219     | m6A4189      |
| 18S  | 34       | Psi34        | 18S | 1238     | Psi1238      | 28S | 2365     | Cm2352       | 28S | 4227     | Um4197       |
| 18S  | 36       | Psi36        | 18S | 1244     | Psi1244      | 28S | 2401     | Am2388       | 28S | 4228     | Gm4198       |
| 18S  | 93       | Psi93        | 18S | 1248     | m1acp3P      | 28S | 2415     | Um2402       | 28S | 4293     | Psi4263      |
| 18S  | 99       | Am99         | 18S | 1272     | Cm1272       | 28S | 2422     | Cm2409       | 28S | 4296     | Psi4266      |
| 18S  | 105      | Psi105       | 18S | 1288     | Um1288       | 28S | 2424     | Gm2411       | 28S | 4299     | Psi4269      |
| 18S  | 109      | Psi109       | 18S | 1326     | Pm1326       | 28S | 2508     | Psi2495      | 28S | 4306     | Um4276       |
| 18S  | 116      | Um116        | 18S | 1328     | Gm1328       | 28S | 2787     | Am2774       | 28S | 4312     | Psi4282      |
| 18S  | 119      | Psi119       | 18S | 1347     | Psi1347      | 28S | 2804     | Cm2791       | 28S | 4353     | Psi4323      |
| 18S  | 121      | Um121        | 18S | 1367     | Psi1367      | 28S | 2815     | Am2802       | 28S | 4361     | Psi4331      |
| 18S  | 159      | Am159        | 18S | 1383     | Am1383       | 28S | 2824     | Cm2811       | 28S | 4370     | Gm4340       |
| 18S  | 166      | Am166        | 18S | 1391     | Cm1391       | 28S | 2837     | Um2824       | 28S | 4392     | Gm4362       |
| 18S  | 172      | Um172        | 18S | 1442     | Um1442       | 28S | 2861     | Cm2848       | 28S | 4403     | Psi4373      |
| 18S  | 174      | Cm174        | 18S | 1445     | Psi1445      | 28S | 2876     | Gm2863       | 28S | 4420     | Psi4390      |
| 18S  | 210      | Psi210       | 18S | 1447     | Gm1447       | 28S | 3637     | Psi3616      | 28S | 4423     | Psi4393      |
| 18S  | 218      | Psi218       | 18S | 1490     | Gm1490       | 28S | 3639     | Psi3618      | 28S | 4431     | Psi4401      |
| 18S  | 406      | Psi406       | 18S | 1625     | Psi1625      | 28S | 3695     | Psi3674      | 28S | 4442     | Psi4412      |
| 18S  | 428      | Um428        | 18S | 1639     | m7G1639      | 28S | 3701     | Cm3680       | 28S | 4443     | m5C4413      |
| 18S  | 436      | Gm436        | 18S | 1643     | Psi1643      | 28S | 3715     | Psi3694      | 28S | 4456     | Cm4426       |
| 18S  | 462      | Cm462        | 18S | 1668     | Um1668       | 28S | 3718     | Am3697       | 28S | 4457     | Psi4427      |
| 18S  | 468      | Am468        | 18S | 1678     | Am1678       | 28S | 3724     | Am3703       | 28S | 4471     | Psi4441      |
| 18S  | 484      | Am484        | 18S | 1692     | Psi1692      | 28S | 3730     | Psi3709      | 28S | 4494     | Gm4464       |
| 18S  | 509      | Gm509        | 18S | 1703     | Cm1703       | 28S | 3734     | Psi3713      | 28S | 4498     | Um4468       |
| 18S  | 512      | Am512        | 18S | 1804     | Um1804       | 28S | 3744     | Gm3723       | 28S | 4499     | Gm4469       |
| 18S  | 517      | Cm517        | 18S | 1832     | m6A1832      | 28S | 3758     | Psi3737      | 28S | 4500     | Psi4470      |
| 18S  | 572      | Psi572       | 18S | 1850     | m62A1850     | 28S | 3760     | Am3739       | 28S | 4521     | Psi4491      |
| 18S  | 576      | Am576        | 18S | 1851     | m62A1851     | 28S | 3762     | Psi3741      | 28S | 4523     | Am4493       |
| 18S  | 590      | Am590        |     |          |              | 28S | 3764     | Psi3743      | 28S | 4530     | m3U4500      |
| 18S  | 601      | Gm601        | 28S | 398      | Am389        | 28S | 3768     | Psi3749      | 28S | 4531     | Psi4501      |
| 18S  | 609      | Psi609       | 28S | 400      | Am391        | 28S | 3770     | m5C3761      | 28S | 4536     | Cm4506       |
| 18S  | 627      | Um627        | 28S | 1316     | Gm1303       | 28S | 3782     | Am3764       | 28S | 4552     | Psi4522      |
| 18S  | 644      | Gm644        | 28S | 1322     | m1A1309      | 28S | 3785     | Gm3771       | 28S | 4571     | Am4541       |
| 18S  | 649      | Psi649       | 28S | 1326     | Am1313       | 28S | 3792     | Cm3787       | 28S | 4576     | Psi4546      |
| 18S  | 651      | Psi651       | 28S | 1340     | Cm1327       | 28S | 3808     | Pm3797       | 28S | 4579     | Psi4549      |
| 18S  | 668      | Am668        | 28S | 1522     | Gm1509       | 28S | 3822     | Psi3801      | 28S | 4590     | Am4560       |
| 18S  | 681      | Psi681       | 28S | 1524     | Am1511       | 28S | 3825     | Am3804       | 28S | 4618     | Gm4588       |
| 18S  | 683      | Gm683        | 28S | 1534     | Am1521       | 28S | 3830     | Am3809       | 28S | 4620     | Um4590       |
| 18S  | 686      | Psi686       | 28S | 1536     | Psi1523      | 28S | 3841     | Cm3820       | 28S | 4623     | Gm4593       |
| 18S  | 797      | Cm797        | 28S | 1582     | Psi1569      | 28S | 3844     | Psi3823      | 28S | 4628     | Psi4598      |
| 18S  | 799      | Um799        | 28S | 1625     | Gm1612       | 28S | 3851     | Psi3830      | 28S | 4636     | Psi4606      |
| 18S  | 801      | Psi801       | 28S | 1677     | Psi1664      | 28S | 3853     | Psi3832      | 28S | 4637     | Gm4607       |
| 18S  | 814      | Psi814       | 28S | 1683     | Psi1670      | 28S | 3867     | Am3846       | 28S | 4673     | Psi4643      |
| 18S  | 815      | Psi815       | 28S | 1744     | Psi1731      | 28S | 3869     | Cm3848       | 28S | 4689     | Psi4659      |

|     |     |        |     |      |         |     |      |         |     |      |         |
|-----|-----|--------|-----|------|---------|-----|------|---------|-----|------|---------|
| 18S | 822 | Psi822 | 28S | 1760 | Gm1747  | 28S | 3884 | Psi3863 | 28S | 4972 | Psi4937 |
| 18S | 863 | Psi863 | 28S | 1779 | Psi1766 | 28S | 3887 | Cm3866  | 28S | 5001 | Psi4966 |
| 18S | 866 | Psi866 | 28S | 1782 | Psi1769 | 28S | 3899 | Gm3878  | 28S | 5010 | Psi4975 |
| 18S | 867 | Gm867  | 28S | 1792 | Psi1779 | 28S | 3920 | Psi3899 |     |      |         |
| 18S | 918 | Psi918 | 28S | 1860 | Psi1847 | 28S | 3925 | Um3904  |     |      |         |

**Table S2** Human RiboMethSeq datasets used for extensive analysis and validation

|    | Cell type                                      | Name                         | Raw reads  | Ref ENA    |
|----|------------------------------------------------|------------------------------|------------|------------|
| 1  | Human umbilical vein endothelial cells (HUVEC) | <b>Sample1</b>               | 22,400,000 | PRJEB34951 |
| 2  | Bone marrow stem cells (BMSC)                  | <b>Sample2</b>               | 22,600,000 | PRJEB34951 |
| 3  | HeLa                                           | <b>Sample3</b>               | 26,400,000 | PRJEB43738 |
| 4  | HeLa                                           | <b>HeLa #1</b>               | 30,700,000 | PRJEB43738 |
| 5  | HeLa                                           | <b>HeLa #2</b>               | 22,300,000 | PRJEB35565 |
| 6  | HeLa                                           | <b>HeLa #3</b>               | 33,100,000 | PRJEB35565 |
| 7  | HeLa                                           | <b>HeLa #4</b>               | 14,000,000 | PRJEB35565 |
| 8  | HeLa                                           | <b>HeLa #5</b>               | 25,000,000 | PRJEB35565 |
| 9  | HeLa                                           | <b>HeLa #6</b>               | 29,700,000 | PRJEB43738 |
| 10 | HeLa                                           | <b>HeLa #7</b>               | 21,600,000 | PRJEB43738 |
| 11 | HeLa                                           | <b>HeLa #8</b>               | 18,600,000 | PRJEB35565 |
| 12 | Human fibroblasts                              | <b>Fibroblasts #1</b>        | 21,900,000 | PRJEB35565 |
| 13 | Wharton's Jelly MSC (WJ-MSC)                   | <b>Wharton's Jelly MSC#1</b> | 25,100,000 | PRJEB35565 |
| 14 | Human mammary epithelial cells (HME)           | <b>HME #1</b>                | 13,200,000 | PRJEB35565 |
| 15 | Human mammary epithelial cells (HME)           | <b>HME #2</b>                | 13,300,000 | PRJEB35565 |
| 16 | Human mammary epithelial cells (HME)           | <b>HME #3</b>                | 16,000,000 | PRJEB35565 |
| 17 | Human mammary epithelial cells (HME)           | <b>HME #4</b>                | 11,300,000 | PRJEB35565 |
| 18 | Human mammary epithelial cells (HME)           | <b>HME #5</b>                | 14,600,000 | PRJEB35565 |
| 19 | Human mammary epithelial cells (HME)           | <b>HME #6</b>                | 17,600,000 | PRJEB35565 |

**Table S3** Comparison of performance for old and new RiboMethSeq scores

| sample                             | <i>Sprime A6 MAX6</i> |             | <i>Sprime3prime A6 MAX6</i> |             | <i>Sprime3prime A2 MEAN2</i> |             |
|------------------------------------|-----------------------|-------------|-----------------------------|-------------|------------------------------|-------------|
|                                    | MCC_max6              | MCC_scoreA6 | MCC_max6                    | MCC_scoreA6 | MCC_mean2                    | MCC_scoreA2 |
| Fibroblasts #1                     | 0.2839                | 0.2026      | 0.3605                      | 0.2931      | 0.4780                       | 0.4407      |
| Sample 1 – HUVEC                   | 0.1546                | 0.1284      | 0.2001                      | 0.1540      | 0.2622                       | 0.2068      |
| Sample 3 – HeLa                    | 0.5802                | 0.4003      | 0.7039                      | 0.6273      | 0.7955                       | 0.7107      |
| HeLa #1                            | 0.6494                | 0.5632      | 0.8089                      | 0.8069      | 0.8249                       | 0.7971      |
| HeLa #2                            | 0.3628                | 0.2103      | 0.4175                      | 0.3714      | 0.5485                       | 0.5058      |
| HeLa #3                            | 0.2340                | 0.1642      | 0.2653                      | 0.2134      | 0.3537                       | 0.3278      |
| HeLa #4                            | 0.3472                | 0.2266      | 0.4247                      | 0.3465      | 0.5669                       | 0.4945      |
| HeLa #5                            | 0.3825                | 0.2474      | 0.5084                      | 0.4068      | 0.6259                       | 0.5523      |
| HeLa #6                            | 0.6788                | 0.6000      | 0.8288                      | 0.8618      | 0.8580                       | 0.8373      |
| HeLa #7                            | 0.6090                | 0.4598      | 0.7832                      | 0.7978      | 0.8398                       | 0.7764      |
| HME #1                             | 0.5295                | 0.5146      | 0.7272                      | 0.6960      | 0.7846                       | 0.7461      |
| HME #2                             | 0.5555                | 0.4639      | 0.7344                      | 0.7038      | 0.7894                       | 0.7360      |
| HME #3                             | 0.5449                | 0.4880      | 0.7460                      | 0.7198      | 0.7855                       | 0.7482      |
| HME #4                             | 0.5453                | 0.5246      | 0.7566                      | 0.7166      | 0.7835                       | 0.7542      |
| HME #5                             | 0.5434                | 0.4893      | 0.6921                      | 0.7038      | 0.7463                       | 0.7341      |
| HME #6                             | 0.5386                | 0.4951      | 0.7171                      | 0.7195      | 0.7776                       | 0.7503      |
| HeLa #8                            | 0.1875                | 0.1240      | 0.2192                      | 0.1475      | 0.2726                       | 0.2337      |
| Sample 2 – BMSC<br>Wharton's Jelly | 0.4021                | 0.3034      | 0.5606                      | 0.4658      | 0.6345                       | 0.5944      |
| MSC#1                              | 0.4509                | 0.3315      | 0.6497                      | 0.5664      | 0.6820                       | 0.6613      |

  

| sample                             | FDR_max6 |             | FDR_scoreA6 |             | FDR_mean2 |             | FDR_scoreA2 |             |
|------------------------------------|----------|-------------|-------------|-------------|-----------|-------------|-------------|-------------|
|                                    | FDR_max6 | FDR_scoreA6 | FDR_max6    | FDR_scoreA6 | FDR_mean2 | FDR_scoreA2 | FDR_max6    | FDR_scoreA2 |
| Fibroblasts #1                     | 0.7966   | 0.8315      | 0.7796      | 0.8204      | 0.2857    | 0.3529      | 0.7966      | 0.8315      |
| Sample 1 – HUVEC                   | 0.9224   | 0.8154      | 0.9045      | 0.9346      | 0.8270    | 0.8985      | 0.9224      | 0.8154      |
| Sample 3 – HeLa                    | 0.3960   | 0.4769      | 0.2745      | 0.3784      | 0.0405    | 0.3070      | 0.3960      | 0.4769      |
| HeLa #1                            | 0.3053   | 0.4720      | 0.0732      | 0.1124      | 0.0494    | 0.1845      | 0.3053      | 0.4720      |
| HeLa #2                            | 0.6262   | 0.7368      | 0.5474      | 0.5914      | 0.3288    | 0.3623      | 0.6262      | 0.7368      |
| HeLa #3                            | 0.8657   | 0.9245      | 0.8620      | 0.8386      | 0.5000    | 0.7377      | 0.8657      | 0.9245      |
| HeLa #4                            | 0.6381   | 0.8682      | 0.4868      | 0.6939      | 0.3494    | 0.2963      | 0.6381      | 0.8682      |
| HeLa #5                            | 0.5876   | 0.8579      | 0.5524      | 0.5495      | 0.3529    | 0.3333      | 0.5876      | 0.8579      |
| HeLa #6                            | 0.1948   | 0.5000      | 0.1400      | 0.0928      | 0.0353    | 0.0690      | 0.1948      | 0.5000      |
| HeLa #7                            | 0.3258   | 0.6455      | 0.0286      | 0.1633      | 0.0968    | 0.2342      | 0.3258      | 0.6455      |
| HME #1                             | 0.4388   | 0.4865      | 0.2752      | 0.2604      | 0.1596    | 0.2083      | 0.4388      | 0.4865      |
| HME #2                             | 0.4924   | 0.5635      | 0.2323      | 0.2745      | 0.1163    | 0.1978      | 0.4924      | 0.5635      |
| HME #3                             | 0.4961   | 0.5912      | 0.2569      | 0.2982      | 0.1881    | 0.2143      | 0.4961      | 0.5912      |
| HME #4                             | 0.4545   | 0.4070      | 0.2632      | 0.3043      | 0.1176    | 0.1915      | 0.4545      | 0.4070      |
| HME #5                             | 0.5274   | 0.5175      | 0.3333      | 0.2745      | 0.1868    | 0.1910      | 0.5274      | 0.5175      |
| HME #6                             | 0.5147   | 0.5391      | 0.2946      | 0.2111      | 0.1190    | 0.2200      | 0.5147      | 0.5391      |
| HeLa #8                            | 0.9131   | 0.9331      | 0.8915      | 0.8350      | 0.7868    | 0.8125      | 0.9131      | 0.9331      |
| Sample 2 – BMSC<br>Wharton's Jelly | 0.5357   | 0.7913      | 0.3000      | 0.5278      | 0.2824    | 0.2740      | 0.5357      | 0.7913      |
| MSC#1                              | 0.4756   | 0.7380      | 0.2237      | 0.4583      | 0.2472    | 0.1831      | 0.4756      | 0.7380      |
